## PD-L1 and intratumoral immune response in breast cancer

Zhi-Qiang Wang<sup>1,4</sup>, Katy Milne<sup>1</sup>, Heather Derocher<sup>1,2</sup>, John R. Webb<sup>1,2</sup>, Brad H. Nelson<sup>1,2,3</sup> and Peter H. Watson<sup>1,4</sup>

<sup>1</sup>Trev & Joyce Deeley Research Centre, British Columbia Cancer Agency, Victoria, British Columbia, Canada

<sup>2</sup>Department of Biochemistry and Microbiology, University of Victoria, Victoria, British Columbia, Canada

<sup>3</sup>Medical Genetics, University of British Columbia, Vancouver, British Columbia, Canada

<sup>4</sup>Department of Pathology and Laboratory Medicine, University of British Columbia, Vancouver, British Columbia, Canada

**Correspondence to:** Peter H. Watson, **email:** pwatson@bccancer.bc.ca

**Keywords:** PD-L1, CD4, CD8, CD68, breast cancer

**Received:** March 19, 2017

**Accepted:** April 28, 2017

**Published:** May 30, 2017

**Copyright:** Wang et al. This is an open-access article distributed under the terms of the Creative Commons Attribution License 3.0 (CC BY 3.0), which permits unrestricted use, distribution, and reproduction in any medium, provided the original author and source are credited.

### ABSTRACT

**Purpose:** PD-L1 is thought to play an important role in the antitumor immune response. In this study, we investigated the expression of PD-L1 within breast tumor subsets to better define its prognostic significance.

**Methods:** Immunohistochemistry was performed to determine PD-L1 tumor cell expression and to enumerate CD8, CD4 and CD68 tumor-infiltrating leucocytes (TIL) in a cohort of 443 breast cancers categorized by molecular subtype.

**Results:** Across the entire cohort, PD-L1 tumor cell expression was observed in 73/443 (16.5%) cases and associated with known indicators of poor prognosis, including low patient age, high tumor grade, ER/PR negative status, but not with outcome. However, in the Triple Negative breast cancer subset PD-L1 was associated with better recurrence free survival (RFS) especially within the Basal-like subset (Hazard ratio = 0.39, 95% CI = 0.22 - 0.86,  $p = 0.018$ ). Combined PD-L1/epithelial CD8 positive status was also strongly associated with better RFS and OS (Hazard ratio = 0.12, 95% CI = 0.10 - 0.71,  $p = 0.010$  and Hazard ratio = 0.11, 95% CI = 0.11 - 0.68,  $p = 0.006$  respectively) in the Basal-like subgroup.

**Conclusions:** PD-L1 expression is associated with better patient survival in Basal-like breast cancer.

### INTRODUCTION

PD-L1 (B7-H1, CD274) is the ligand for Programmed death-1 (PD-1, CD279) and is expressed on the surface of cancer cells in addition to its expression on infiltrating immune cells. PD-1 is an immune-suppressive receptor that is expressed on activated T cells, B cells, monocytes and dendritic cells [1, 2]. PD-L1 activates PD-1 leading to inhibitory signals that regulate T-cell activation and tolerance [1] and impede the antitumor immune response [3, 4].

Recent research has shown that blockade of the interaction between PD-L1 and PD-1 can enhance T cell function and facilitate antitumor activity, and various monoclonal antibodies against PD-1 and PD-L1 are in clinical trials for a variety of solid tumor types, including

breast cancer, with encouraging activity in many cancers [5]. PD-L1 expression has been studied as a potential biomarker of response in different types of cancer [6–14]. However, the prognostic value of high PD-L1 expression in malignancies remains unclear: most studies reveal a correlation with worse outcome [7–11], whereas a correlation with favorable outcome has been observed in ovary, melanoma, glioma and non-small cell lung carcinoma [12–15]. The results of breast cancer studies are no different. Some studies revealed a negative correlation between PD-L1 expression and outcome [16, 17], while others showed no association with outcome [18, 19] or a positive association with outcome [20–23].

These conflicting results warrant further exploration. When reviewing the literature, we observed that few previous studies had been conducted on the Basal-

like subset of breast cancer (see Supplementary Table 1). This is important because evidence shows that the association between tumor infiltrating leucocytes (TILs) and survival is strongest in this Triple Negative tumor subset, suggesting that this is the most immunologically reactive form of breast cancer. Therefore, there is a clear need for studies with sufficient cohort size and appropriate categorization to enable major subgroup analysis to evaluate the significance of PD-L1 in subgroups of breast tumors. The primary aim of this study was to investigate the association of PD-L1 expression on tumor cells with clinical outcome in a large population-based cohort with a long-term follow-up and within five recognized molecular subsets of breast cancer. We also analyzed the relation between PD-L1 expression and three key indicators of the intra-tumoral immune response, CD8, CD4, and CD68 tumor infiltrating leucocytes (TIL).

## RESULTS

### Cohort characteristics

We studied a cohort of 443 patients with primary breast cancer diagnosed in the period 1988-1995. The mean length of follow-up data was 87 months (range 2 to 251 months). There were 184 breast cancer-specific deaths (mean time from diagnosis = 26 months) and 259 survivors (mean time to last follow-up date = 90 months). Primary therapy included surgical resection in all cases, followed by adjuvant hormone, radiation, and chemotherapy in 331 (75%), 160 (36%), 93 (21%) cases, respectively; 30 cases (7%) did not receive any form of systemic therapy. The clinical-pathological characteristics of the entire cohort and the Basal-like subgroup are provided (Table 1).

### Expression of PD-L1 and association with clinical-pathological features

We examined the association between tumor cell PD-L1 expression and clinical-pathological features using an FDA approved and validated antibody and a defined cutoff value of the 75<sup>th</sup> percentile of the range of scores to delineate low from high expression levels. Expression of PD-L1 by tumor cells was observed in 73 (16.5%) of the 443 evaluable primary breast cancers (Figure 1). The typical PD-L1 tumor cell staining pattern observed was membranous. PD-L1 staining was also frequently observed in stromal cells with features suggesting macrophage like cells (Figure 1) as previously described in ovarian cancer, but this staining not scored [15]. PD-L1 expression was significantly associated with patient age, tumor grade, and ER/PR status (Table 2). PD-L1 positive status was also significantly different between the molecular intrinsic subtypes: high levels of PD-L1 were seen in only a small proportion of Luminal A, Luminal B, and Her2 subtype tumors (12% and 9% respectively) and

an intermediate proportion of Luminal B subtype tumors (21%) compared to higher proportions of Triple Negative Non-Basal (TNNB) and Basal-like subtype tumors (31% and 33% respectively; Table 2).

### Correlation between tumor PD-L1 and pattern of the intra-tumor immune response

The relation between PD-L1 and the levels and localization of CD8, CD4, and CD68 TIL was assessed (Figure 3). As reported in our prior studies [24, 25], the intraepithelial densities of all three TIL subsets were higher in triple negative subsets (TNNB and Basal-like) compared to the rest of the cohort. PD-L1 positive status tended to be associated with higher TIL density in all subsets. This pattern was most prominent for intra-epithelial CD8 and CD68 in the triple negative subsets compared to the non-TNBC subsets (Figure 3A and 3B). However, despite the differing prognostic significance of PD-L1 within the two TNBC subsets (Basal-like and TNNB tumors), the overall pattern of TIL was no different in PD-L1 positive and negative cases (Figure 3C and 3D).

### Association of PD-L1 expression with CD8 TIL and clinical outcomes

Univariate analysis of standard prognostic factors in the entire cohort confirmed tumor size, nodal status, ER status, PR status and high tumor grade as significant prognostic factors (Supplementary Table 3). PD-L1 and eCD8 and sCD8 were also not prognostic for relapse free survival (RFS) or overall survival (OS) in the overall cohort (Supplementary Table 3) or in any of the non-triple negative molecular subtypes (data not shown). Within the combined group of Triple Negative breast cancers (TNNB and Basal-like subsets), PD-L1 positive status showed a trend toward better OS and was significantly associated with RFS; in contrast, eCD8 TIL positive status was not associated with RFS or OS (data not shown). In the TNNB subset, PD-L1 positive status and CD8 positive status were also not significant for RFS or OS.

However, in the Basal-like subset, PD-L1 positive status was significantly associated with RFS (Hazard ratio = 0.39, 95% CI = 0.22 - 0.86,  $p = 0.018$ ) and showed a trend toward better OS (Figure 2 and Supplementary Table 3). Consistent with our prior report [24], eCD8 positive status was significant for RFS and OS within the Basal-like subset (Hazard ratio = 0.41, 95% CI = 0.20 - 0.87,  $p = 0.021$ ) (Figure 2). When PD-L1 and eCD8 status were considered together, tumors that were positive for both PD-L1 and eCD8 were associated with RFS and OS, whereas tumors with mixed status or dual negative PD-L1/eCD8 status were not (Hazard ratio = 0.12, 95% CI = 0.10 - 0.71,  $p = 0.010$  and Hazard ratio = 0.11, 95% CI = 0.11 - 0.68,  $p = 0.006$  respectively) (Figure 2 upper panels and Table 3). Within the Triple Negative group, this

**Table 1: Demographic and clinical-pathological characteristics of patients in the study cohort**

| Parameter               | Status            | Total cohort |    | Basal subset |     |
|-------------------------|-------------------|--------------|----|--------------|-----|
|                         |                   | Cases        | %  | Cases        | %   |
| Age at diagnosis        | ≤35 years         | 13           | 3  | 7            | 10  |
|                         | >35years          | 430          | 97 | 62           | 90  |
| Tumor size <sup>a</sup> | T1a/b             | 2            | <1 | 1            | <1  |
|                         | T1c               | 69           | 16 | 7            | 10  |
|                         | T2                | 277          | 63 | 40           | 58  |
|                         | T3                | 66           | 15 | 15           | 22  |
|                         | Unknown           | 29           | 7  | 6            | 9   |
| Nodal status            | Positive          | 190          | 43 | 33           | 48  |
|                         | Negative          | 228          | 51 | 26           | 38  |
|                         | Unknown           | 25           | 6  | 10           | 14  |
| Tumor grade             | 1                 | 71           | 16 | 4            | 5   |
|                         | 2                 | 267          | 60 | 19           | 28  |
|                         | 3                 | 103          | 23 | 46           | 67  |
|                         | Unknown           | 2            | <1 | 0            | 0   |
| ER <sup>b</sup>         | Positive          | 203          | 46 | 0            | 0   |
|                         | Negative          | 240          | 54 | 69           | 100 |
|                         | Unknown           | 0            | 0  | 0            | 0   |
| PR <sup>b</sup>         | Positive          | 228          | 51 | 0            | 0   |
|                         | Negative          | 215          | 49 | 69           | 100 |
|                         | Unknown           | 0            | 0  | 0            | 0   |
| Molecular subtypes      | Luminal A         | 193          | 44 |              |     |
|                         | Luminal B         | 48           | 11 |              |     |
|                         | Her2              | 67           | 15 |              |     |
|                         | TNNB <sup>c</sup> | 35           | 8  |              |     |
|                         | Basal-like        | 69           | 15 |              |     |
|                         | Unclassified      | 32           | 7  |              |     |

<sup>a</sup>Tumor size: 0.1cm<T1a/b<1cm; 1cm ≤ T1c<2cm; 2cm≤T2<5cm; 5cm≤T3.

<sup>b</sup>ER negative defined as <10 fmol/mg protein and PR negative as ≤15 fmol/mg protein (ligand binding assay).

<sup>c</sup>TNNB: Triple negative-non-basal.

association remained significant in the Basal-like subset but not the TNNB subset (Figure 2 middle and lower panels) and was the only prognostic parameter tested that was significant (Table 3).

To validate these findings, we conducted in-silico analysis of microarray gene expression data using an online survival analysis tool to assess the prognostic effect of PD-L1 in another cohort [26]. Supplementary Figure 1 shows that PD-L1 was prognostic for RFS but not OS within this overall cohort (RFS:  $p < 0.001$ , OS:  $p = ns$ ).

Within the Basal-like subset, PD-L1 was prognostic for both RFS and OS (RFS:  $p = 0.0001$ ; OS:  $p = 0.011$ ).

## DISCUSSION

In this study, we used the SP142 rabbit monoclonal antibody that recognizes an epitope in the C-terminus of human PD-L1 protein and an empirically selected cutpoint that corresponds to the upper quartile of expression levels in the cohort to determine PD-L1 tumor cell expression

status and its relation to outcome in breast cancer subsets. PD-L1 was positive overall in 16.5% of a typical consecutive series of breast tumors and was associated with high TIL and with better survival outcome only in the Basal-like subtype.

In assessing the literature published to date regarding tumor cell expression of PD-L1 and outcomes in breast cancer (see Supplementary Table 1), it is important to consider several factors that vary between studies, including antibodies, scoring cut-off definitions, the composition of the cohorts and assessment methods. Different retrospective studies have reported PD-L1 breast tumor cell expression in 21% to 64% of cases but have used a spectrum of different approaches to assess expression [16, 17, 20–23, 27–29]. Amongst those studies that have used an immunohistochemistry approach that can discriminate between tumor cell and host immune cell expression, several different antibodies and cutpoints have also been used [16, 17, 21–23, 27]. It is also important to note that while several of the latter studies reported on analysis of Basal-like tumors, the categorization approach described in some of these studies was incomplete (e.g. subtyping on clinical ER/PR and Her2 status alone [17, 27]) and in these studies the cases described as Basal-like would actually correspond to what we have defined here as the Triple Negative subset. Only one comparable immunohistochemistry study (with a substantial sized cohort of basal-like cases defined by the same 5 biomarker panel but using a different PD-L1 antibody), has recently been published and made similar observations to those in the comparably sized primary and larger validation cohorts used in this study [22]. However, these findings should be qualified by the relatively small Basal-like cohorts in both studies that may in part account for the fact that none of the standard clinical prognostic variables, including nodal status, were statistically significant for

outcomes in the basal-like subsets in either study. Also it should be noted that the cohort in this study was selected in order to provide long term outcome data but predates current surgical approaches and adjuvant therapies that have improved outcomes.

Although the majority of Triple Negative breast cancers have Basal-like characteristics (and the majority of tumors expressing ‘basal’ markers are triple-negative), these two terms are not synonymous [30]. Several groups have used genomic analysis to identify different subsets within Triple Negative cancers including some that are delineated by gene expression profiles suggesting weak versus strong intratumoral immune responses and that differ in prognosis [31, 32]. For example Burstein et al focusing specifically on the basal-like subtype delineated four subgroups: (i) luminal androgen receptor (AR; LAR), (ii) mesenchymal (MES), (iii) basal-like immunosuppressed (BLIS), and (iv) basal-like immune-activated (BLIA) subsets, each with distinct characteristics [33]. The BLIS subgroup appears to correspond to cluster C2 [34] and overlaps with the mesenchymal subgroup defined by others [35], while the BLIA subgroup is reflected in the cluster C3 described in other studies [34]. It is interesting that the BLIA subtype displays upregulation of genes associated with B cell, T cell, and natural killer cells. Accordingly, it also exhibits activation of STAT transcription factor-mediated pathways and has the best relative prognosis [32]. It is possible that the BLIA subtype may correspond to the PD-L1 positive/ TIL high tumors observed here to exhibit a relatively better prognosis. The BLIA subgroup may also be mirrored by the Immunity 2 metagene signature [36]. Interestingly this metagene signature is highly correlated with PD1 and PD-L1 metagenes and also a good prognosis.

PD-L1 is expressed by many cell types and in the tumor microenvironment PD-L1 is predominantly

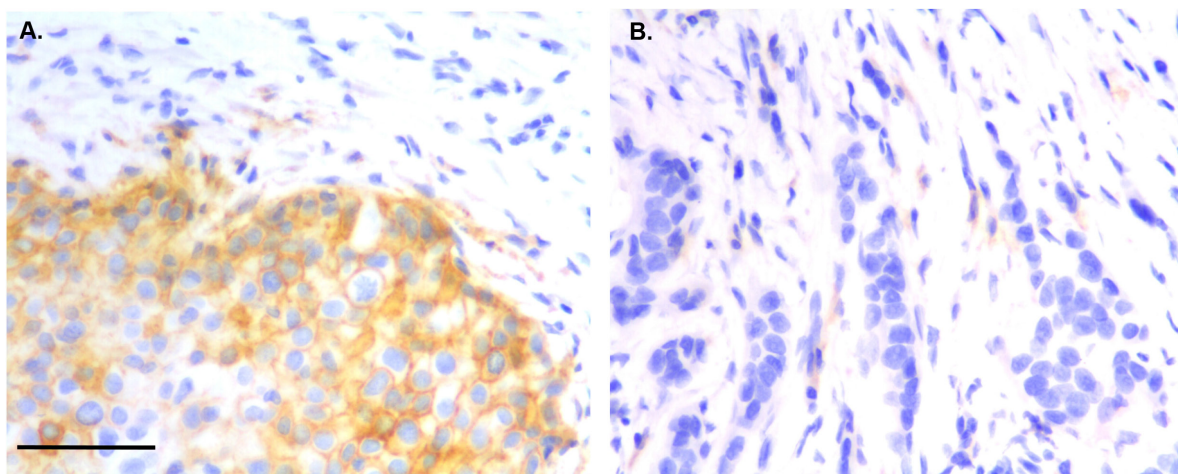

**Figure 1:** Immunohistochemical staining showing PD-L1 positive staining in tumor cells (A) and TIL (B). Magnification  $\times 400$ . Bar 200  $\mu\text{m}$ .

**Table 2: Association between PD-L1 expression and clinico-pathological characteristics**

| Parameter              |                   | PDL-1 expression |          | p-value      |
|------------------------|-------------------|------------------|----------|--------------|
|                        |                   | Low (%)          | High (%) |              |
| Age at diagnosis (yrs) | ≤35 years         | 8 (62%)          | 5 (38%)  | <b>0.046</b> |
|                        | >35 years         | 362 (84%)        | 68 (16%) |              |
| Tumor size (cm)        | T1a/b             | 1 (50%)          | 1 (50%)  | 0.629        |
|                        | T1c               | 57 (83%)         | 12 (17%) |              |
|                        | T2                | 231 (83%)        | 46 (17%) |              |
|                        | T3                | 56 (85%)         | 10 (15%) |              |
| Nodal status           | Positive          | 193 (85%)        | 35 (15%) | 0.980        |
|                        | Negative          | 161 (85%)        | 29 (15%) |              |
| Tumor grade            | 1                 | 62 (87%)         | 9 (13%)  | <b>0.001</b> |
|                        | 2                 | 233 (87%)        | 34 (13%) |              |
|                        | 3                 | 73 (71%)         | 30 (29%) |              |
| ER status              | Positive          | 212 (88%)        | 28 (12%) | <b>0.005</b> |
|                        | Negative          | 158 (78%)        | 45 (22%) |              |
| PR status              | Positive          | 192 (89%)        | 23 (11%) | <b>0.002</b> |
|                        | Negative          | 178 (78%)        | 50 (22%) |              |
| Molecular subtypes     | Luminal A         | 170 (88%)        | 23 (12%) | <b>0.013</b> |
|                        | Luminal B         | 38 (79%)         | 10 (21%) |              |
|                        | Her2              | 61 (91%)         | 6 (9%)   |              |
|                        | TNNB <sup>a</sup> | 24 (69%)         | 11 (31%) |              |
|                        | Basal-like        | 46 (67%)         | 23 (33%) |              |

<sup>a</sup>TNNB: Triple negative non-basal.

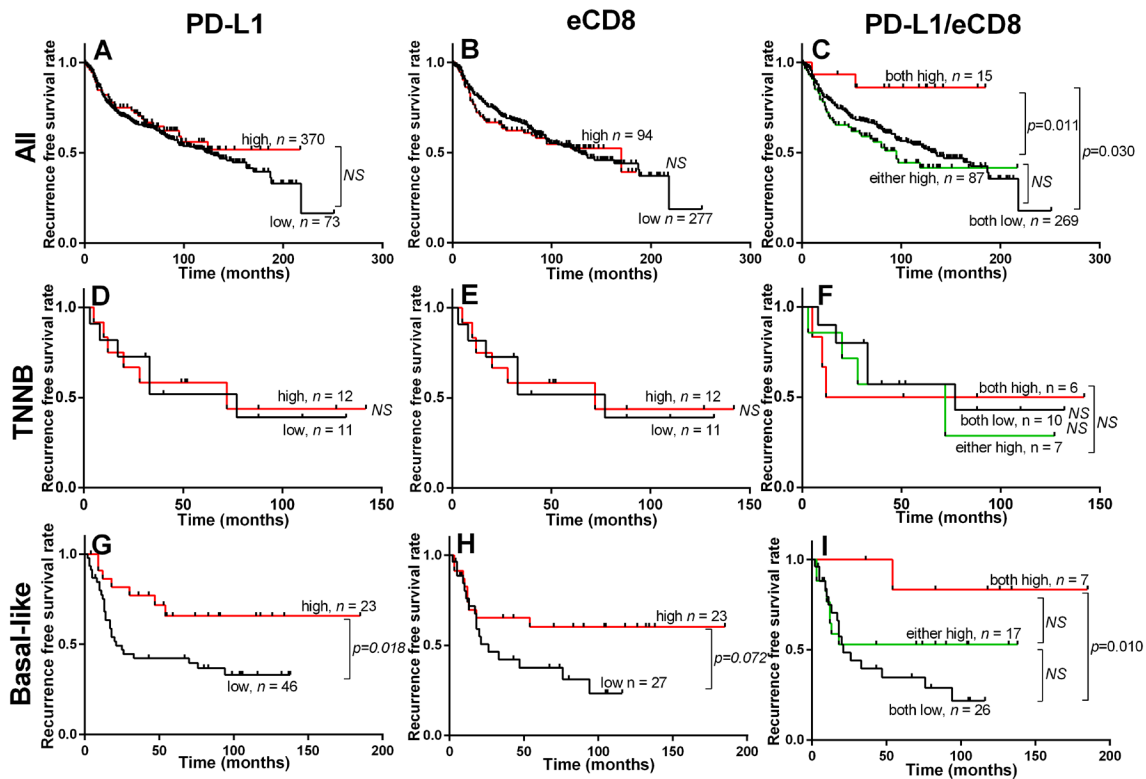

**Figure 2: Prognostic impact of PD-L1 and CD8 in breast cancer.** Kaplan-Meier plots showing recurrence free survival (RFS) in entire cohort, TNNB and Basal-like subgroups stratified according to the expression status of intra-epithelial PD-L1 (A, D, G) and eCD8 (B, E, H) and PD-L1/eCD8 in combination (C, F, I). The log-rank test was used to compare curves, and *p*-values less than 0.05 were considered significant. NS = no significance.

expressed by CD68 macrophages [15]. But it is well documented that PD-L1 is also expressed by tumor cells and can inhibit the antitumor activity of CD4+ and CD8+ T cells via the inhibitory receptor PD-1 [3, 4]. PD-L1 has therefore generally been assumed to act as an immunosuppressive molecule and indeed has been associated with diminished TIL and poor prognosis in a range of malignancies [7–11]. In contrast, our results and those of others suggests that expression of tumor PD-L1 positively correlates with higher TIL [37, 38], a better response to neoadjuvant chemotherapy [39], and improved overall outcomes in some types of breast cancer [20–23]. While it may seem paradoxical that an immunosuppressive molecule should show these

favorable associations, it is now recognized that TIL can induce tumor cell PD-L1 expression by producing cytokines such as interferon gamma (IFN  $\gamma$ ) [40]. Indeed, IFN  $\gamma$ -induced PD-L1 expression has been demonstrated in Basal-like subtype breast cancer cell models along with other types of cancer cells [18, 41]. This phenomenon has been referred to as “adaptive resistance”, as it represents one potential means by which tumors can oppose immune infiltration with corresponding anti-tumor cell activity [42, 43]. However, while the effectiveness of this adaptive resistance mechanism may be limited, the induction of PD-L1 remains an indicator of strong antitumor immunity within the tumor (infiltrating lymphocytes producing cytokines in response to tumor-specific or tumor-selective

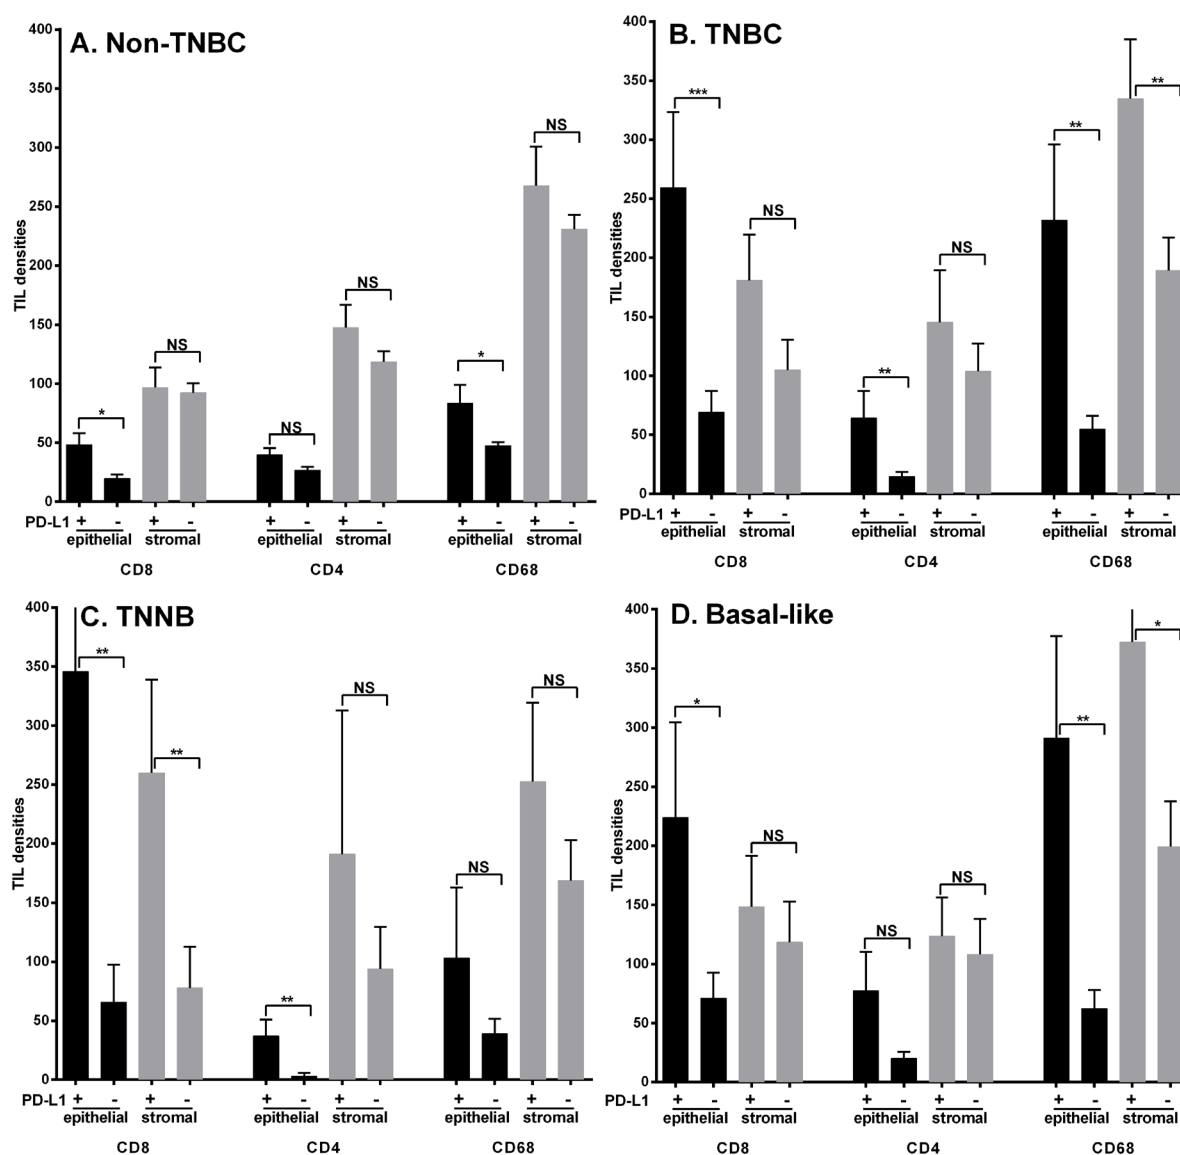

**Figure 3:** Associations between tumor cell PD-L1 expression and TIL cell densities within Non-TNBC (A), TNBC (B), TNNB (C) and Basal-like subtypes (D). Bars represent means +/- standard error. Black and grey bars represent intra-epithelial and intra-stromal densities of CD8, CD4, and CD68 positive TIL respectively. Non-TNBC = Luminal A + Luminal B + Her2; TNBC cases = TNNB (Triple Negative Non Basal) + Basal-like subtypes; NS = no significance, \* $p \leq 0.05$ , \*\* $p \leq 0.01$ , \*\*\* $p \leq 0.001$ .

**Table 3: Univariate and multivariate analyses of associations between clinical parameters and PD-L1/eCD8 combined status and either relapse free survival or overall survival in the Basal-like subgroup**

| A/ Recurrence-free survival |                       | Univariate       |              | Multivariate     |              |
|-----------------------------|-----------------------|------------------|--------------|------------------|--------------|
| Parameter                   | Comparison            | HR (95% CI)      | p-value      | HR (95% CI)      | p-value      |
| Age at diagnosis (yrs)      | >35 vs ≤35            | 0.95 (0.22-4.14) | 0.947        | 0.26 (0.05-1.47) | 0.127        |
| Tumor size (cm)             | >2cm vs ≤2cm          | 2.33 (0.79-4.94) | 0.151        | 1.86 (0.50-6.93) | 0.354        |
| Nodal status                | pos vs neg            | 1.45 (0.64-3.25) | 0.380        | 1.44 (0.54-3.82) | 0.463        |
| Tumor grade                 | 2 vs 1                | 0.39 (0.10-2.22) | 0.349        | 0.44 (0.05-3.67) | 0.450        |
|                             | 3 vs 1                | 1.86 (0.35-7.69) | 0.536        | 1.18 (0.44-3.21) | 0.743        |
| PD-L1 + eCD8 expression     | Both high vs both low | 0.12 (0.10-0.71) | <b>0.010</b> | 0.10 (0.01-0.96) | <b>0.046</b> |
| B/ Overall survival         |                       | Univariate       |              | Multivariate     |              |
| Parameter                   | Comparison            | HR (95% CI)      | p-value      | HR (95% CI)      | p-value      |
| Age at diagnosis (yrs)      | >35 vs ≤35            | 0.96 (0.22-4.14) | 0.954        | 0.13 (0.02-0.91) | 0.040        |
| Tumor size (cm)             | >2cm vs ≤2cm          | 1.74 (0.66-3.96) | 0.294        | 1.20 (0.36-3.98) | 0.764        |
| Nodal status                | pos vs neg            | 1.42 (0.65-3.06) | 0.393        | 1.21 (0.47-3.08) | 0.693        |
| Tumor grade                 | 2 vs 1                | 0.41 (0.10-2.44) | 0.393        | 0.40 (0.05-3.29) | 0.396        |
|                             | 3 vs 1                | 2.08 (0.41-7.50) | 0.459        | 1.12 (0.43-2.92) | 0.824        |
| PD-L1 + eCD8 expression     | Both high vs both low | 0.11 (0.11-0.68) | <b>0.006</b> | 0.07 (0.06-0.75) | <b>0.028</b> |

antigens). The positive association between TIL and PD-L1 expression described here is consistent with this model and is further supported by our observation that tumors positive for both PD-L1 and CD8 TIL had better outcomes than those positive for PD-L1 alone within the Basal-like subtype. However, adaptive resistance may not be the only factor in driving PD-L1 expression as it can be up-regulated in breast cancer by other mechanisms such as PTEN loss and ensuing activation of the PI3K pathway [37].

In conclusion, these observations are consistent with the view that PD-L1 expression in tumor cells represents an adaptive immune resistance mechanism and is associated with a better prognosis. Moreover, our results suggest that Basal-like breast cancers may respond best to PD1/PD-L1 blockade.

## MATERIALS AND METHODS

### Case cohort

A cohort of 443 breast cancer cases was studied representing primary tumors collected by the Manitoba Breast Tumor Bank [44] at time of diagnosis and initial surgical intervention. Age at diagnosis, tumor grade, size, nodal status, and outcomes in terms of relapses and deaths were recorded. All tumors were histologically

classified and graded by one pathologist (PHW). The time of diagnosis and accrual by the bank (1988-1995) predated current biomarker assays. Therefore immunohistochemistry (IHC) was previously performed by the Bank using an auto-immunostainer (Discovery Staining Module, Ventana Medical Systems, AZ, USA) on TMA sections from the cohort for ER, PR, Ki67, CK5/6, EGFR and Her2 biomarkers. ER, PR, and Her2 were scored and positive status assigned according to ACP guidelines [45, 46]. Ki67, CK5/6 and EGFR were also scored and positive status assigned as >14% (Ki67) or any positive tumor cell staining (CK5/6 and EGFR). On the basis of the IHC determined expression of these five biomarkers the cohort was classified by the Bank into five intrinsic molecular subtypes: Luminal A (ER+/Ki67-/Her-), Luminal B (ER+/Ki67+/Her-), Her2 (Her2+), Triple Negative Non-Basal (TNNB, ER-/PR-/Her-/CK5/6-/EGFR-), and Basal-like (ER-/PR-/Her- and either CK5/6+ and/or EGFR+) [47, 48]. The Tumor Bank operates with approval of the University of Manitoba Biomedical Research Ethics Board and this research study was conducted under approval from the BC Cancer Agency Research Ethics Board. A report concerning the source of the biospecimens and data used according to the BRISQ guidelines [49] is provided in Supplementary Table 2.

## Tissue microarray (TMA) construction

Primary tumors were represented in tissue microarrays (TMAs) compiled by the Tumor Bank. To construct a TMA, all cases were initially selected from the database and then sections were re-reviewed to confirm and select areas for coring of corresponding blocks. Duplicate tissue cores (0.6 mm diameter) were taken from central cellular areas of each tumor with a tissue arrayer instrument (Beecher Instruments, Silver Spring, MD, USA). The original cohort of 636 cases was arrayed across 7 blocks. Prior utilization of these blocks and exhaustion of individual cores meant that the final interpretable cohort for this study was 443 cases.

## Immunohistochemistry and TMA scoring

PD-L1 and CD8, CD4, CD68 staining was performed on deparaffinized sections from TMAs using a Biocare Medical Intellipath FLX autostainer using reagents from Biocare (Concord, CA) unless otherwise noted. Slides were deparaffinized manually through xylene and graded alcohols then antigen retrieval performed in Biocare's decloaking chamber using Diva decloaking solution for 125°C for 30 seconds. Slides were loaded into the Intellipath FLX, subjected to non-specific blocking with Peroxidase-1 and background sniper then incubated with either PD-L1 (clone SP142, Pleasanton, CA, 1/1000), CD8 (clone C8/144B, Cell Marque, Rocklin, CA, 1/250), CD4 (clone EPR6855, Abcam, 1/250) or CD68 (clone SP251, Spring Biosciences, Pleasanton, CA, 1/150) in Da Vinci Green diluents for 30 minutes at room temperature. The slides were then incubated with either Rabbit-(PD-L1, CD68, CD4)-HRP or Mach2 Mouse-(CD8) polymer for 30 minutes at room temperature and then detected with IP DAB for 5 minutes followed by counterstaining with a 1:10 dilution of CAT hematoxylin, air drying and coverslipping with Ecomount.

IHC scoring was performed by an experienced breast pathologist (PHW) in a blinded fashion with respect to each case. TMA sections were initially assessed at low magnification to select the core with the highest density of positive cells. PD-L1 expression by tumor cells was then assessed in the area of the 0.6 mm core by the H score method whereby the expression is quantitated as the product of staining intensity (ranked from 0 to 3) and proportion of positive staining tumor cells (0 to 100%) to give an expression score range from 0 to 300. PD-L1 expression in TIL was not scored. For statistical analyses, tumor cell expression was categorized into low or high expression levels based on scores below or above the upper 75<sup>th</sup> quartile. TIL markers were assessed as described previously [50] by direct counting of positive cells (numbers were based on exact counts up to 20 cells or estimated when cell numbers were in excess of this number (IHC score, range 0–100). The area of the entire core occupied by tumor epithelium versus stroma was

then assessed followed by estimation of the proportion of positive TIL that were intra-epithelial or intra-stromal; intra-epithelial localization was defined as lymphocytes within tumor cell nests and/or in direct contact with tumor cells. Intra-epithelial and intra-stromal TIL density per core was then calculated for each TIL subset (and designated, for example, as eCD8 and sCD8), and duplicate values were averaged for each case. For statistical analysis CD8 TIL levels in tumors were categorized into low or high TIL status based on the upper quartile (75<sup>th</sup> percentile) of epithelial and stromal TIL- density scores (eCD8 and sCD8).

## Statistical analysis

Associations between PD-L1 expression and clinical-pathological features were evaluated using chi-square test and, where necessary, Fisher t test. Comparisons of intra-epithelial and intra-stromal TIL densities stratified by PD-L1 high/low expression were performed using Mann-Whitney test. Assessment of the correlation between PD-L1 and other immune markers was performed using a nonparametric Spearman correlation. Survival was calculated using the Kaplan-Meier method, and curves were compared with the log-rank test. Multivariate survival analyses were done using Cox regression analysis. All statistical tests were two-sided with significance established at *p*-values less than 0.05. Statistical analyses were performed using Graphpad Prism 6.0 (GraphPad, La Jolla, CA, USA) and SPSS statistics 17 (SPSS, Chicago, IL, USA).

## ACKNOWLEDGMENTS

Clinical specimens were provided by the Manitoba Breast Tumor Bank, associated with the Canadian Tissue Repository Network (CTRNet). We also thank Michelle Parisien and Dr Leigh Murphy for assistance in compiling the case cohort from the Manitoba Breast Tumor Bank and Sonya Laan for assistance with immunostaining.

## CONFLICTS OF INTEREST

The authors declare no conflicts of interest.

## GRANT SUPPORT

This study was sustained by a grant to P.H.W from the Canadian Cancer Society Research Institute (#702375).

## REFERENCES

1. Francisco LM, Sage PT, Sharpe AH. The PD-1 pathway in tolerance and autoimmunity. *Immunol Rev.* 2010; 236:219-242.

2. Keir ME, Butte MJ, Freeman GJ, Sharpe AH. PD-1 and its ligands in tolerance and immunity. *Annu Rev Immunol*. 2008; 26:677-704.
3. Iwai Y, Ishida M, Tanaka Y, Okazaki T, Honjo T, Minato N. Involvement of PD-L1 on tumor cells in the escape from host immune system and tumor immunotherapy by PD-L1 blockade. *Proc Natl Acad Sci U S A*. 2002; 99:12293-12297.
4. Dong H, Strome SE, Salomao DR, Tamura H, Hirano F, Flies DB, Roche PC, Lu J, Zhu G, Tamada K, Lennon VA, Celis E, Chen L. Tumor-associated B7-H1 promotes T-cell apoptosis: a potential mechanism of immune evasion. *Nat Med*. 2002; 8:793-800.
5. Henick BS, Herbst RS, Goldberg SB. The PD-1 pathway as a therapeutic target to overcome immune escape mechanisms in cancer. *Expert Opin Ther Targets*. 2014; 18:1407-1420.
6. Chen L, Deng H, Lu M, Xu B, Wang Q, Jiang J, Wu C. B7-H1 expression associates with tumor invasion and predicts patient's survival in human esophageal cancer. *Int J Clin Exp Pathol*. 2014; 7:6015-6023.
7. Lin YM, Sung WW, Hsieh MJ, Tsai SC, Lai HW, Yang SM, Shen KH, Chen MK, Lee H, Yeh KT, Chen CJ. High PD-L1 expression correlates with metastasis and poor prognosis in oral squamous cell carcinoma. *PLoS One*. 2015; 10:e0142656.
8. Leite KR, Reis ST, Junior JP, Zerati M, Gomes Dde O, Camara-Lopes LH, Srougi M. PD-L1 expression in renal cell carcinoma clear cell type is related to unfavorable prognosis. *Diagn Pathol*. 2015; 10:189.
9. Hamanishi J, Mandai M, Iwasaki M, Okazaki T, Tanaka Y, Yamaguchi K, Higuchi T, Yagi H, Takakura K, Minato N, Honjo T, Fujii S. Programmed cell death 1 ligand 1 and tumor-infiltrating CD8<sup>+</sup> T lymphocytes are prognostic factors of human ovarian cancer. *Proc Natl Acad Sci U S A*. 2007; 104:3360-3365.
10. Shi SJ, Wang LJ, Wang GD, Guo ZY, Wei M, Meng YL, Yang AG, Wen WH. B7-H1 expression is associated with poor prognosis in colorectal carcinoma and regulates the proliferation and invasion of HCT116 colorectal cancer cells. *PLoS One*. 2013; 8:e76012.
11. Nomi T, Sho M, Akahori T, Hamada K, Kubo A, Kanehiro H, Nakamura S, Enomoto K, Yagita H, Azuma M, Nakajima Y. Clinical significance and therapeutic potential of the programmed death-1 ligand/programmed death-1 pathway in human pancreatic cancer. *Clin Cancer Res*. 2007; 13:2151-2157.
12. Thierauf J, Veit JA, Affolter A, Bergmann C, Grunow J, Laban S, Lennerz JK, Grunmuller L, Mauch C, Plinkert PK, Hess J, Hoffmann TK. Identification and clinical relevance of PD-L1 expression in primary mucosal malignant melanoma of the head and neck. *Melanoma Res*. 2015; 25:503-509.
13. Liu Y, Carlsson R, Ambjorn M, Hasan M, Badn W, Darabi A, Siesjo P, Issazadeh-Navikas S. PD-L1 expression by neurons nearby tumors indicates better prognosis in glioblastoma patients. *J Neurosci*. 2013; 33:14231-14245.
14. Cooper WA, Tran T, Vilain RE, Madore J, Selinger CI, Kohonen-Corish M, Yip P, Yu B, O'Toole SA, McCaughan BC, Yearley JH, Horvath LG, Kao S, et al. PD-L1 expression is a favorable prognostic factor in early stage non-small cell carcinoma. *Lung Cancer*. 2015; 89:181-188.
15. Webb JR, Milne K, Kroeger DR, Nelson BH. PD-L1 expression is associated with tumor-infiltrating T cells and favorable prognosis in high-grade serous ovarian cancer. *Gynecol Oncol*. 2016; 141:293-302.
16. Qin T, Zeng YD, Qin G, Xu F, Lu JB, Fang WF, Xue C, Zhan JH, Zhang XK, Zheng QF, Peng RJ, Yuan ZY, Zhang L, Wang SS. High PD-L1 expression was associated with poor prognosis in 870 Chinese patients with breast cancer. *Oncotarget*. 2015; 6:33972-33981. doi: 10.18632/oncotarget.5583.
17. Muenst S, Schaerli AR, Gao F, Daster S, Trella E, Drosier RA, Muraro MG, Zajac P, Zanetti R, Gillanders WE, Weber WP, Soysal SD. Expression of programmed death ligand 1 (PD-L1) is associated with poor prognosis in human breast cancer. *Breast Cancer Res Treat*. 2014; 146:15-24.
18. Ali HR, Glont SE, Blows FM, Provenzano E, Dawson SJ, Liu B, Hiller L, Dunn J, Poole CJ, Bowden S, Earl HM, Pharoah PD, Caldas C. PD-L1 protein expression in breast cancer is rare, enriched in basal-like tumours and associated with infiltrating lymphocytes. *Ann Oncol*. 2015; 26:1488-1493.
19. Park IH, Kong SY, Ro JY, Kwon Y, Kang JH, Mo HJ, Jung SY, Lee S, Lee KS, Kang HS, Lee E, Joo J, Ro J. Prognostic implications of tumor-infiltrating lymphocytes in association with programmed death ligand 1 expression in early-stage breast cancer. *Clin Breast Cancer*. 2016; 16:51-58.
20. Schalper KA, Velcheti V, Carvajal D, Wimberly H, Brown J, Pusztai L, Rimm DL. *In situ* tumor PD-L1 mRNA expression is associated with increased TILs and better outcome in breast carcinomas. *Clin Cancer Res*. 2014; 20:2773-2782.
21. Baptista MZ, Sarian LO, Derchain SF, Pinto GA, Vassallo J. Prognostic significance of PD-L1 and PD-L2 in breast cancer. *Hum Pathol*. 2016; 47:78-84.
22. Beckers RK, Selinger CI, Vilain R, Madore J, Wilmott JS, Harvey K, Holliday A, Cooper CL, Robbins E, Gillett D, Kennedy CW, Gluch L, Carmalt H, et al. Programmed death ligand 1 expression in triple-negative breast cancer is associated with tumour-infiltrating lymphocytes and improved outcome. *Histopathology*. 2016; 69:25-34.
23. Cimino-Mathews A, Thompson E, Taube JM, Ye X, Lu Y, Meeker A, Xu H, Sharma R, Lecksell K, Cornish TC, Cuka N, Argani P, Emens LA. PD-L1 (B7-H1) expression and the immune tumor microenvironment in primary and metastatic breast carcinomas. *Hum Pathol*. 2016; 47:52-63.

24. Wang ZQ, Milne K, Derocher H, Webb JR, Nelson BH, Watson PH. CD103 and intratumoral immune response in breast cancer. *Clin Cancer Res*. 2016; 15:6290-6297.
25. Wang ZQ, Milne K, Webb JR, Watson PH. CD74 and intratumoral immune response in breast cancer. *Oncotarget*. 2017; 8:12664-12674. doi: 10.18632/oncotarget.8610.
26. Györfy B, Lanczky A, Eklund AC, Denkert C, Budczies J, Li Q, Szallasi Z. An online survival analysis tool to rapidly assess the effect of 22,277 genes on breast cancer prognosis using microarray data of 1,809 patients. *Breast Cancer Res Treat*. 2010; 123:725-731.
27. Li Z, Dong P, Ren M, Song Y, Qian X, Yang Y, Li S, Zhang X, Liu F. PD-L1 expression is associated with tumor FOXP3(+) regulatory T-cell infiltration of breast cancer and poor prognosis of patient. *J Cancer*. 2016; 7:784-793.
28. Sun WY, Lee YK, Koo JS. Expression of PD-L1 in triple-negative breast cancer based on different immunohistochemical antibodies. *J Transl Med*. 2016; 14:173.
29. Sabatier R, Finetti P, Mamessier E, Adelaide J, Chaffanet M, Ali HR, Viens P, Caldas C, Birnbaum D, Bertucci F. Prognostic and predictive value of PDL1 expression in breast cancer. *Oncotarget*. 2015; 6:5449-5464. doi: 10.18632/oncotarget.3216.
30. Badve S, Dabbs DJ, Schnitt SJ, Baehner FL, Decker T, Eusebi V, Fox SB, Ichihara S, Jacquemier J, Lakhani SR, Palacios J, Rakha EA, Richardson AL, et al. Basal-like and triple-negative breast cancers: a critical review with an emphasis on the implications for pathologists and oncologists. *Mod Pathol*. 2011; 24:157-167.
31. Lehmann BD, Pietenpol JA. Clinical implications of molecular heterogeneity in triple negative breast cancer. *Breast*. 2015; 24:S36-40.
32. Liu YR, Jiang YZ, Xu XE, Yu KD, Jin X, Hu X, Zuo WJ, Hao S, Wu J, Liu GY, Di GH, Li DQ, He XH, et al. Comprehensive transcriptome analysis identifies novel molecular subtypes and subtype-specific RNAs of triple-negative breast cancer. *Breast Cancer Res*. 2016; 18:33.
33. Burstein MD, Tsimelzon A, Poage GM, Covington KR, Contreras A, Fuqua SA, Savage MI, Osborne CK, Hilsenbeck SG, Chang JC, Mills GB, Lau CC, Brown PH. Comprehensive genomic analysis identifies novel subtypes and targets of triple-negative breast cancer. *Clin Cancer Res*. 2015; 21:1688-1698.
34. Jezequel P, Loussouarn D, Guerin-Charbonnel C, Campion L, Vanier A, Gouraud W, Lasla H, Guette C, Valo I, Verrielle V, Campone M. Gene-expression molecular subtyping of triple-negative breast cancer tumours: importance of immune response. *Breast Cancer Res*. 2015; 17:43.
35. Lehmann BD, Bauer JA, Chen X, Sanders ME, Chakravarthy AB, Shyr Y, Pietenpol JA. Identification of human triple-negative breast cancer subtypes and preclinical models for selection of targeted therapies. *J Clin Invest*. 2011; 121:2750-2767.
36. Bonsang-Kitzis H, Sadacca B, Hamy-Petit AS, Moarii M, Pinheiro A, Laurent C, Reyat F. Biological network-driven gene selection identifies a stromal immune module as a key determinant of triple-negative breast carcinoma prognosis. *Oncoimmunology*. 2016; 5:e1061176.
37. Mittendorf EA, Philips AV, Meric-Bernstam F, Qiao N, Wu Y, Harrington S, Su X, Wang Y, Gonzalez-Angulo AM, Akcakanat A, Chawla A, Curran M, Hwu P, et al. PD-L1 expression in triple-negative breast cancer. *Cancer Immunol Res*. 2014; 2:361-370.
38. Thompson E, Taube JM, Elwood H, Sharma R, Meeker A, Warzecha HN, Argani P, Cimino-Mathews A, Emens LA. The immune microenvironment of breast ductal carcinoma *in situ*. *Mod Pathol*. 2016; 29:249-258.
39. Wimberly H, Brown JR, Schalper K, Haack H, Silver MR, Nixon C, Bossuyt V, Pusztai L, Lannin DR, Rimm DL. PD-L1 expression correlates with tumor-infiltrating lymphocytes and response to neoadjuvant chemotherapy in breast cancer. *Cancer Immunol Res*. 2015; 3:326-332.
40. Sanmamed MF, Chen L. Inducible expression of B7-H1 (PD-L1) and its selective role in tumor site immune modulation. *Cancer J*. 2014; 20:256-261.
41. Bellucci R, Martin A, Bommarito D, Wang K, Hansen SH, Freeman GJ, Ritz J. Interferon-gamma-induced activation of JAK1 and JAK2 suppresses tumor cell susceptibility to NK cells through upregulation of PD-L1 expression. *Oncoimmunology*. 2015; 4:e1008824.
42. Taube JM, Anders RA, Young GD, Xu H, Sharma R, McMiller TL, Chen S, Klein AP, Pardoll DM, Topalian SL, Chen L. Colocalization of inflammatory response with B7-h1 expression in human melanocytic lesions supports an adaptive resistance mechanism of immune escape. *Sci Transl Med*. 2012; 4:127ra137.
43. Topalian SL, Hodi FS, Brahmer JR, Gettinger SN, Smith DC, McDermott DF, Powderly JD, Carvajal RD, Sosman JA, Atkins MB, Leming PD, Spigel DR, Antonia SJ, et al. Safety, activity, and immune correlates of anti-PD-1 antibody in cancer. *N Engl J Med*. 2012; 366:2443-2454.
44. Watson PH, Snell L, Parisien M. The NCIC-Manitoba Breast Tumor Bank: a resource for applied cancer research. *CMAJ*. 1996; 155:281-283.
45. Hammond ME, Hayes DF, Dowsett M, Allred DC, Hagerty KL, Badve S, Fitzgibbons PL, Francis G, Goldstein NS, Hayes M, Hicks DG, Lester S, Love R, et al. American Society of Clinical Oncology/College of American Pathologists guideline recommendations for immunohistochemical testing of estrogen and progesterone receptors in breast cancer. *Arch Pathol Lab Med*. 2010; 134:907-922.
46. Wolff AC, Hammond ME, Schwartz JN, Hagerty KL, Allred DC, Cote RJ, Dowsett M, Fitzgibbons PL, Hanna WM, Langer A, McShane LM, Paik S, Pegram MD, et al. American Society of Clinical Oncology/College of American Pathologists guideline recommendations for

- human epidermal growth factor receptor 2 testing in breast cancer. *Arch Pathol Lab Med.* 2007; 131:18-43.
47. Blows FM, Driver KE, Schmidt MK, Broeks A, van Leeuwen FE, Wesseling J, Cheang MC, Gelmon K, Nielsen TO, Blomqvist C, Heikkila P, Heikkinen T, Nevanlinna H, et al. Subtyping of breast cancer by immunohistochemistry to investigate a relationship between subtype and short and long term survival: a collaborative analysis of data for 10,159 cases from 12 studies. *PLoS Med.* 2010; 7:e1000279.
48. Cheang MC, Voduc D, Bajdik C, Leung S, McKinney S, Chia SK, Perou CM, Nielsen TO. Basal-like breast cancer defined by five biomarkers has superior prognostic value than triple-negative phenotype. *Clin Cancer Res.* 2008; 14:1368-1376.
49. Moore HM, Kelly AB, Jewell SD, McShane LM, Clark DP, Greenspan R, Hayes DF, Hainaut P, Kim P, Mansfield E, Potapova O, Riegman P, Rubinstein Y, et al. Biospecimen reporting for improved study quality (BRISQ). *J Proteome Res.* 2011; 10:3429-3438.
50. West NR, Panet-Raymond V, Truong PT, Alexander C, Babinszky S, Milne K, Ross LA, Loken S, Watson PH. Intratumoral immune responses can distinguish new primary and true recurrence types of ipsilateral breast tumor recurrences (IBTR). *Breast Cancer (Auckl).* 2011; 5:105-115.
